# Supplementary material for: VvGA2ox8-Likefrom grape confers drought tolerance by activating the antioxidant defense system
Source: Research Square preprint supplement (doi:10.21203/rs.3.rs-8861300/v1), 2026-02-24
Supplement: Supplementary file 1 [file 80d936ffc80686b4059161db.xlsx]

## Sheet: Sheet1
Primer name	primer sequence（5’→3’）	uses
VvGA2ox8-Like-F	gagaacacgggggacgagctcATGGAATCAGAGCCACCATTTG	Overexpression
VvGA2ox8-Like-R	caccatggtgtcgactctagaTCATCTGCGAAATCTTGAAAGCC	Overexpression
VvGA2ox8-Like-F	aggccgaattcccggggatccttATGGAATCAGAGCCACCATTTG	BD Carrier
VvGA2ox8-Like-R	ccgctgcaggtcgacggatccTCATCTGCGAAATCTTGAAAGCC	BD Carrier
VvGRX-S7-F	gtgggcatcgatacgggatccATGTCGTTTGCCACCACTTTACA	AD Carrier
VvGRX-S7-R	cagctcgagctcgatggatccTCAGGAGCACATCGCCTTCT	AD Carrier
VvGA2ox8-Like-F	gtgggcatcgatacgggatccATGGAATCAGAGCCACCATTTG	AD Carrier
VvGA2ox8-Like-R	cagctcgagctcgatggatccTCATCTGCGAAATCTTGAAAGCC	AD Carrier
VvGA2ox8-F	gccgggccctctagaggatccATGGAATCAGAGCCACCATTTG	NLuc
VvGA2ox8-R	gagaacacgggggacgagctcTCTGCGAAATCTTGAAAGCCC	NLuc
VvGRX-S7-F	gccgggccctctagaggatccATGTCGTTTGCCACCACTTTACA	CLuc
VvGRX-S7-R	gagaacacgggggacgagctcTCAGGAGCACATCGCCTTCT	CLuc
VvGRX-S7-F	gagaacacgggggacgagctcATGTCGTTTGCCACCACTTTACA	Overexpression
VvGRX-S7-R	caccatggtgtcgactctagaTCAGGAGCACATCGCCTTCT	Overexpression
VvGA2ox8-F	GAGTTGTTCCGGCAGCCATTCC	qRT‑PCR
VvGA2ox8-R	GCTTCAGACCATGCGAATTGCTTC	qRT‑PCR
VvABF3-F	AGCAGCAGGATCACCATCATCAAC	qRT‑PCR
VvABF3-R	CTCCACTCTGTAGCCCACCATTTG	qRT‑PCR
VvABI5-F	CCGTAAGTCCAGTGTCTTCCGATG	qRT‑PCR
VvABI5-R	GTTGTCTCCGTTCCACCACCTTC	qRT‑PCR
VvOST1-F	GGAGTCAGCTACTGTCATGCGATG	qRT‑PCR
VvOST1-R	GAATGCAGCACTGAGGACTTGGAG	qRT‑PCR
VvCPK6-F	ACCAATAAAGACGGCACCATGAGG	qRT‑PCR
VvCPK6-R	TGTCCCAATTTACGCCCCAATGAG	qRT‑PCR
VvKIN7-F	TAAGTTATCCGGTGGTGCCATTGC	qRT‑PCR
VvKIN7-R	GCTTCACTGCCGCCACATCC	qRT‑PCR
