# Supplementary material for: VvGA2ox8-Likefrom grape confers drought tolerance by activating the antioxidant defense system
Source: Research Square preprint supplement (doi:10.21203/rs.3.rs-8861300/v1), 2026-02-24
Supplement: Supplementary file 2 [file 8d5419355da45c972dffa2fc.xlsx]

## Sheet: Sheet1
Primer name	primer sequence（5’→3’）
VIT_200s0220g00070-F	ATGGAAGTGTGAGTCGCAGG
VIT_200s0220g00070-R	AGGCTCCTTCCACCTGGTAT
VIT_206s0004g07770-F	GTGTGCCCTGGTGTAGTCTC
VIT_206s0004g07770-R	GGGATGTTGTTGTTGGCACC
VIT_214s0006g01790-F	CGAAGGGGTTCTTGTTCGGA
VIT_214s0006g01790-R	GCGGTTCCGTTTTCAGCAAT
VIT_208s0040g01710-F	TGCTGCCATTATGGAGCACA
VIT_208s0040g01710-R	TCTGCAGGGGATCCATCTCA
VIT_211s0037g00440-F	ATGGACGGTTGAGATTGCGT
VIT_211s0037g00440-R	CATCCCTGCTATTGCGTTGC
VIT_212s0055g01010-F	ATGCCAAGACACAGCTCGAA
VIT_212s0055g01010-R	CCGTAGGCACTTTCCACACT
VIT_206s0061g01430-F	CATGGACTGGCTGAGCAAGA
VIT_206s0061g01430-R	GCTGAGCTCTAGCCCATGAG
VIT_207s0031g00350-F	GGAAGGGCAGCAAAACCAAG
VIT_207s0031g00350-R	GGGTGTTTTGCCGTCAACTC
VIT_211s0065g00350-F	AATGAGGCCTCCAATTGGGG
VIT_211s0065g00350-R	ATTGGAGTGAACGCGACTGT
